# Supplementary material for: A New One-Tube Reaction Assay for the Universal Determination of Sweet Cherry (Prunus avium L.) Self-(In)Compatible MGST- and S-Alleles Using Capillary Fragment Analysis
Source: MDPI journal article supplement (doi:10.3390/ijms24086931), 2023-04-08
Supplement: s1 [file s1]

## Supplementary material

**Figure S1.** The *P. avium* S54 allele from the ‘Techlovicka’ cultivar sequence analysis. A) genomic DNA alignment [OQ555802 for *P. avium* S54; JQ627790 for *P. virginiana* S2]; B) protein alignment [OQ555802 translation for *P. avium* S54; AFJ20682 for *P. virginiana* S2].

A)

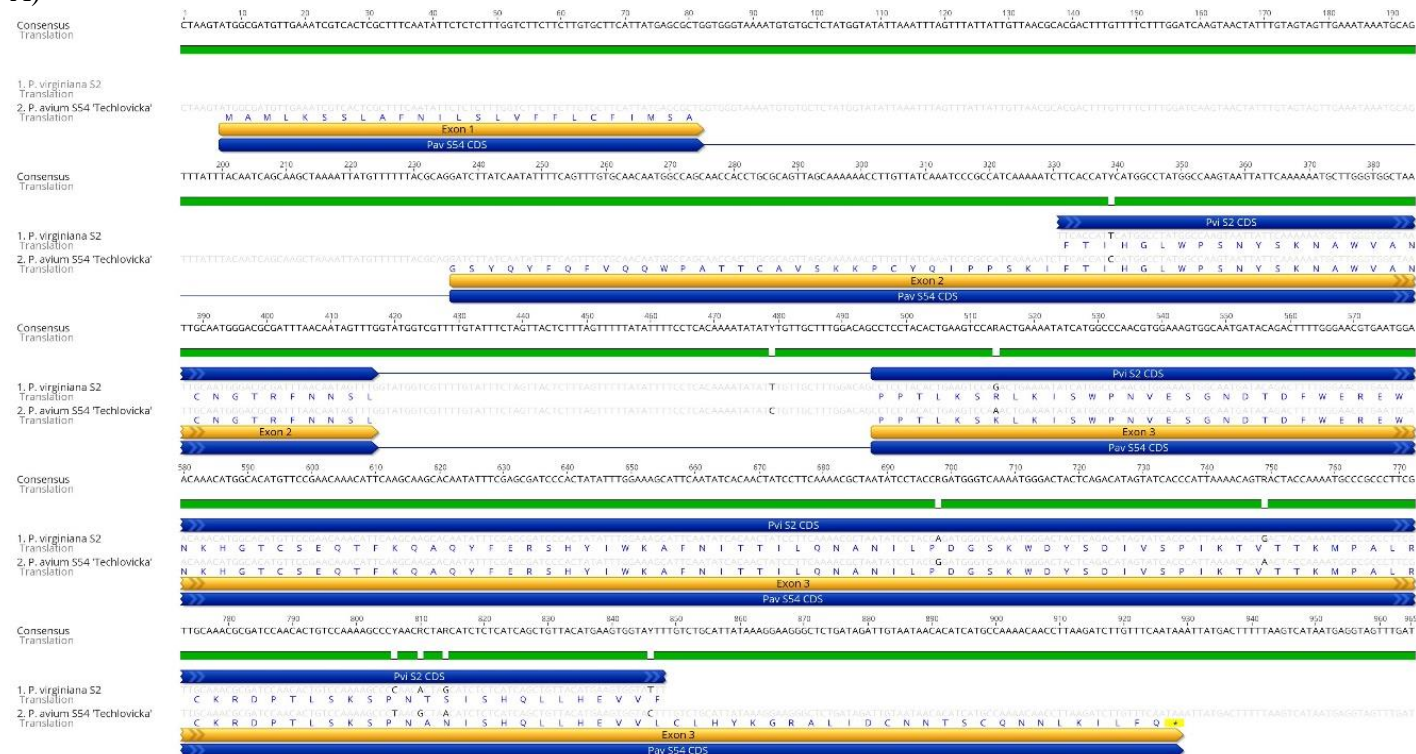

**B)**

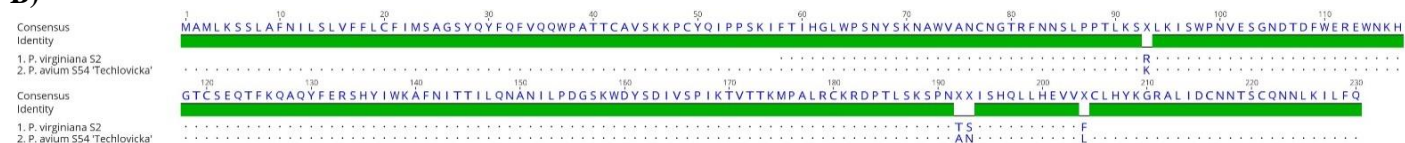

**Figure S2.** The *P. avium* S54 allele from the ‘Techlovicka’ cultivar phylogenetic tree. The S54 protein sequence was compared with BLAST records and the phylogenetic tree was constructed using Geneious Prime software. Branches are denoted by GenBank numbers.

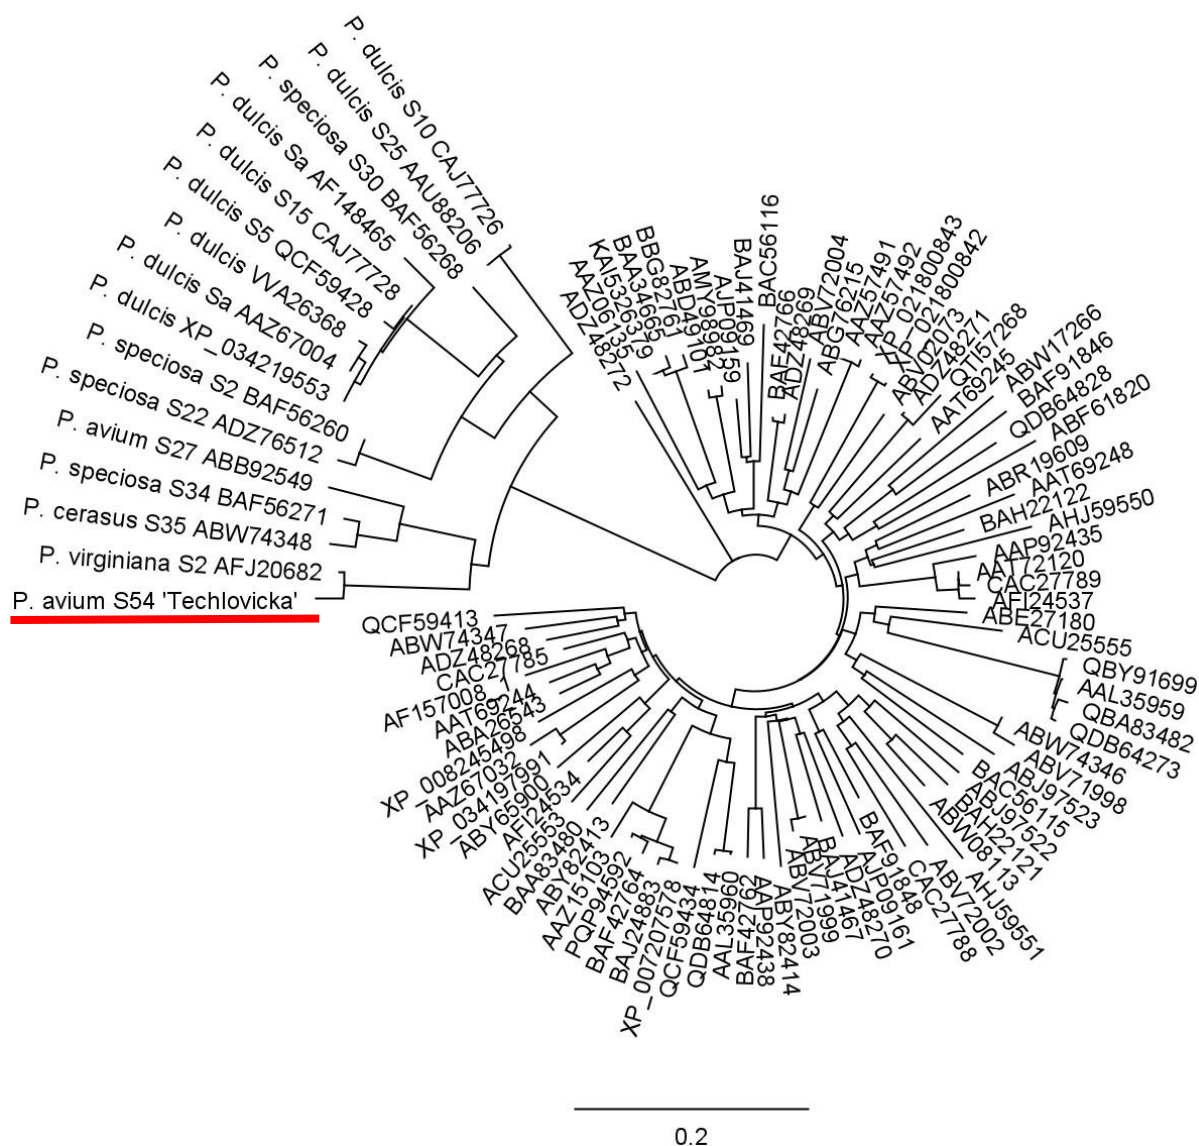

**Figure S3.** The S-RNase-Ex3-R primer binding site sequence analysis in selected S-alleles. The mismatched nucleotide is shown in bold red, and the region of the primer in the pink frame.

| S-RNase-Ex3-R                                   |                                                                        |      |
|-------------------------------------------------|------------------------------------------------------------------------|------|
| CGTGGAAAGTGGCAATGATAC                           |                                                                        |      |
| S-RNase S1, Early Rivers, AJ635281              | AAGAGATCTTGGCCCGAC <b>CGTGGAAAGTGGCAATGATAC</b> AAGATTTTGGGAAGGCGAATGG | 597  |
| S-RNase S2, Early Rivers, AJ635283              | AAGAGATCTTGGCCCGACGTGGAAAGTGGCAATGATAC <b>AAGATTTTGGGAAGGCGAATGG</b>   | 1933 |
| S-RNase S6, Colney, AJ635291                    | CAGACATCTTGGCCCGACGTGGAAAGTGGCAATGATAC <b>AAAGTTTGGGAAGGCGAATGG</b>    | 306  |
| S-RNase S7, Charger, AJ635268                   | AAGATACTTGGCCAGACGTGGAAAGTGGCAATGATAC <b>AAATTTTGGGAAGGCGAATGG</b>     | 1985 |
| S-RNase S9, Inge, AJ635270                      | AAGAGATCTTGGCCCGACGTGGAAAGTGGCAATGATAC <b>AAGTTTGGGAAGGCGAATGG</b>     | 527  |
| S-RNase S12, Schneiders Spaete Knorp., AJ635274 | AAGAAATCTTGGCCCGACGTGGAAAGTGGCAATGATAC <b>AAATTTTGGGAAGGCGAATGG</b>    | 1496 |
| S-RNase S13, Noble, AJ635276                    | AAAAGATCTTGGCCCGACGTGGAA <b>CTGGCAATGATAC</b> AAATTTTGGGAAGGCGAATGG    | 597  |
| S-RNase S22, Kiechelsberger Kracher, DQ336138   | AAGAAATCTTGGCCCGACGTGGAAAGTGGCAATGATAC <b>AAATTTTGGGAAGGCGAATGG</b>    | 332  |
| S-RNase S24, Pico Colorado, CDS AY259112        | CAGACATCTTGGCCCGACGTGGAAAGTGGCAATGATAC <b>AAAGTTTGGGAAGGCGAATGG</b>    | 92   |

**Figure S4.** Sequence analysis of MGST alleles. MGSTins: ‘Cristobalina’; MGSTdel: ‘Kronio’; MGSTwt: ‘Satonishiki’

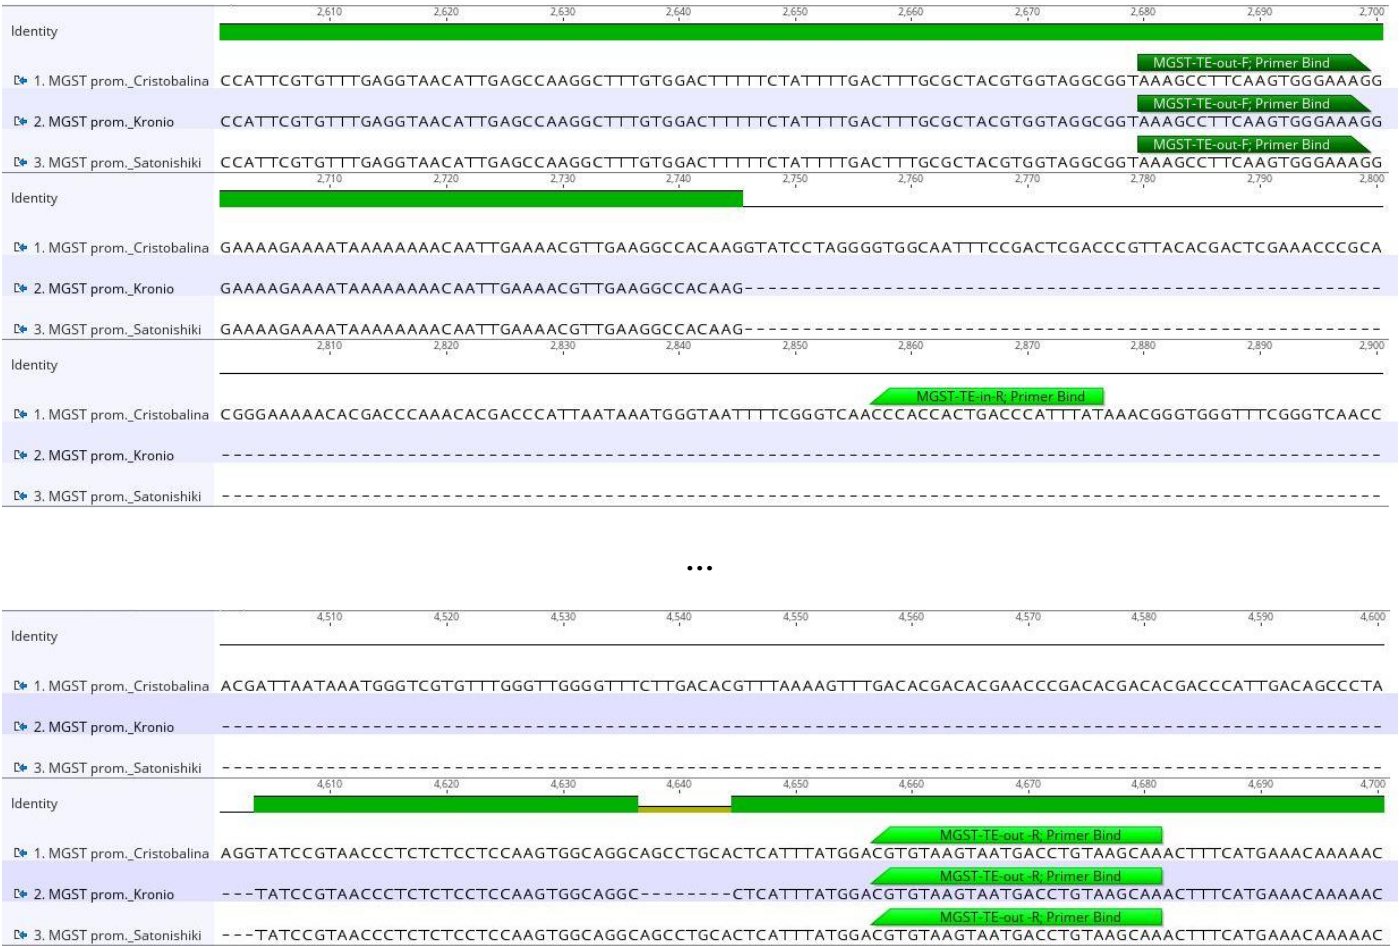

**Figure S5.** Outputs of fragment analyses of all tested S-alleles and MGST alleles. A) 'Charger' (S1S7 MGSTwt); B) 'Feldes Fruehe Schwarze' (S1S14 MGSTwt); C) HL18188 (S2S3' MGSTwt); D) 'Buketova' (S2S16 MGSTwt); E) Rtyńska ptacka (S2S25 MGSTwt); F) 'Cristobalina' (S3S6 MGSTwt/MGSTins); G) 'Winklerova' (S3S22 MGSTwt); H) HL 13272 x 'Halka' (S4S4' MGSTwt); I) 'Viola' (S4S12 MGSTwt); J) 'Techlovicka' (S4S54 MGSTwt); K) 'Felicita' (S4'S9 MGSTwt); L) 1:1 mixed sample of 'Kronio' (S5'S6 MGSTwt/MGSTdel) + 'Uriase de Bystrita' (S5S12 MGSTwt); M) 'Uriase de Bystrita' (S5S12 MGSTwt); N) 'Rita' (S5S22 MGSTwt); O) 'Kronio' (S5'S6 MGSTwt/MGSTdel); P) 437 NDR (S7S9 MGSTwt); Q) Italia 2 (S13S14 MGSTwt); R) P-HL-A (S13S25 MGSTwt).

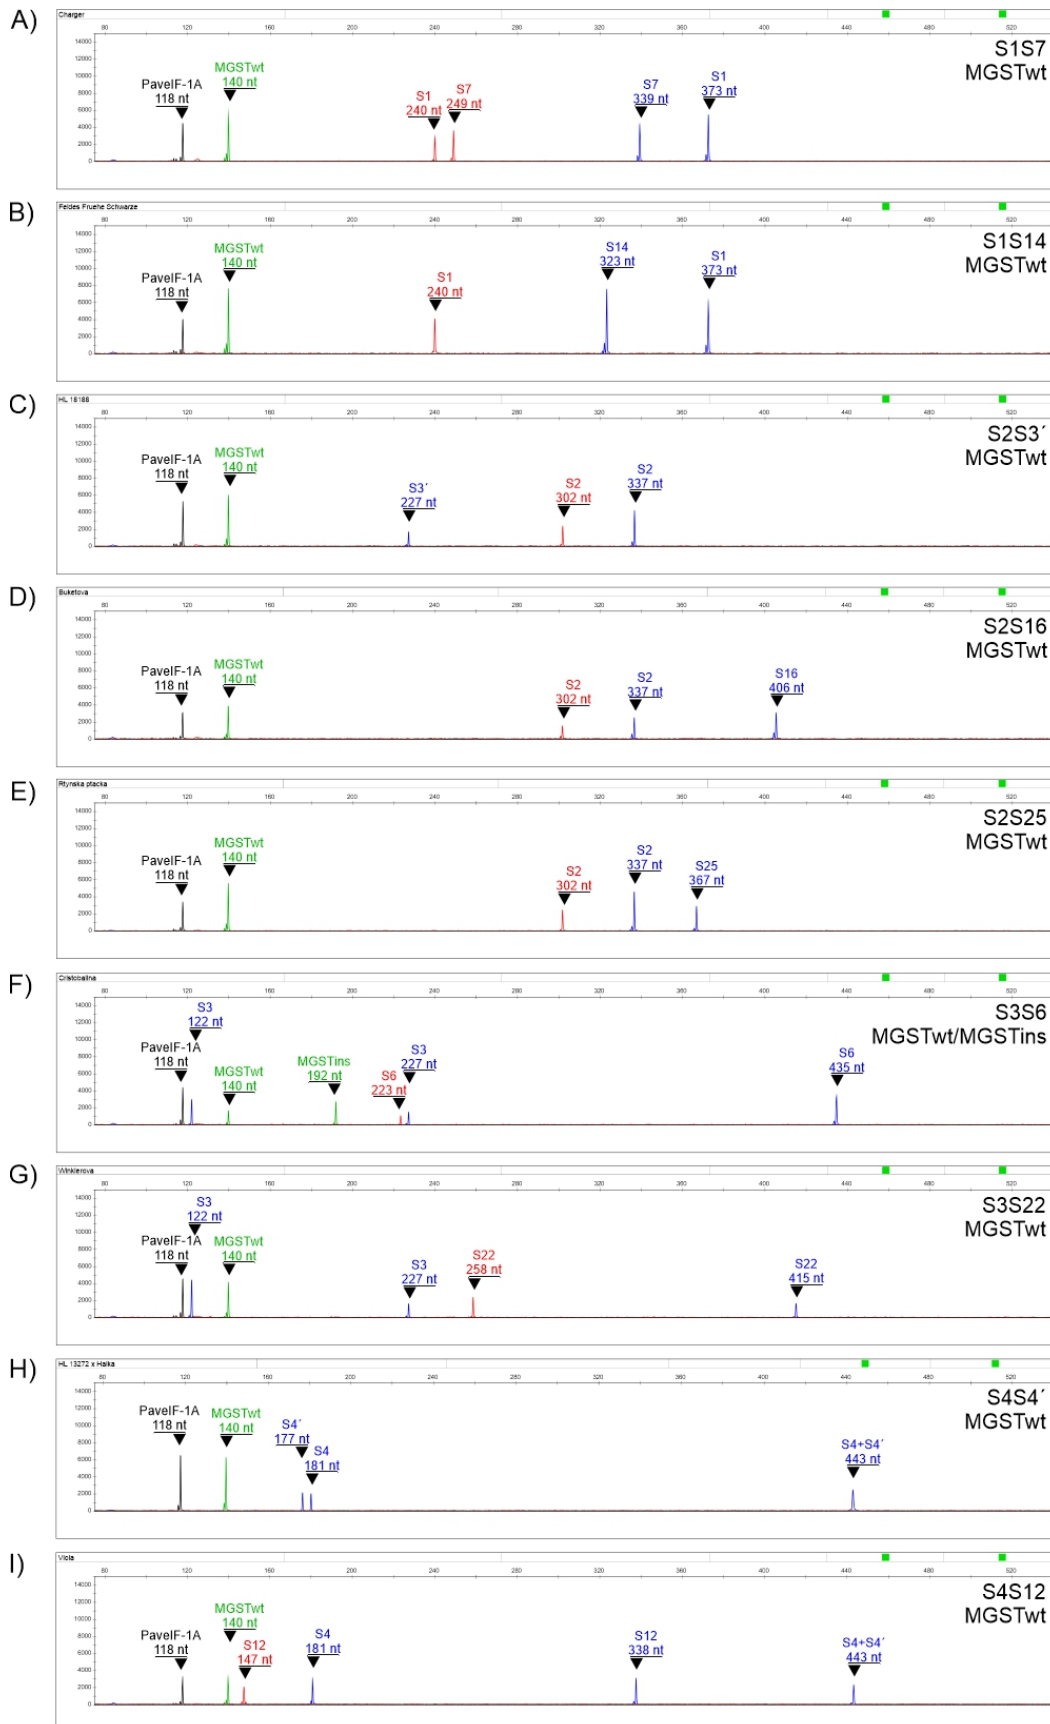



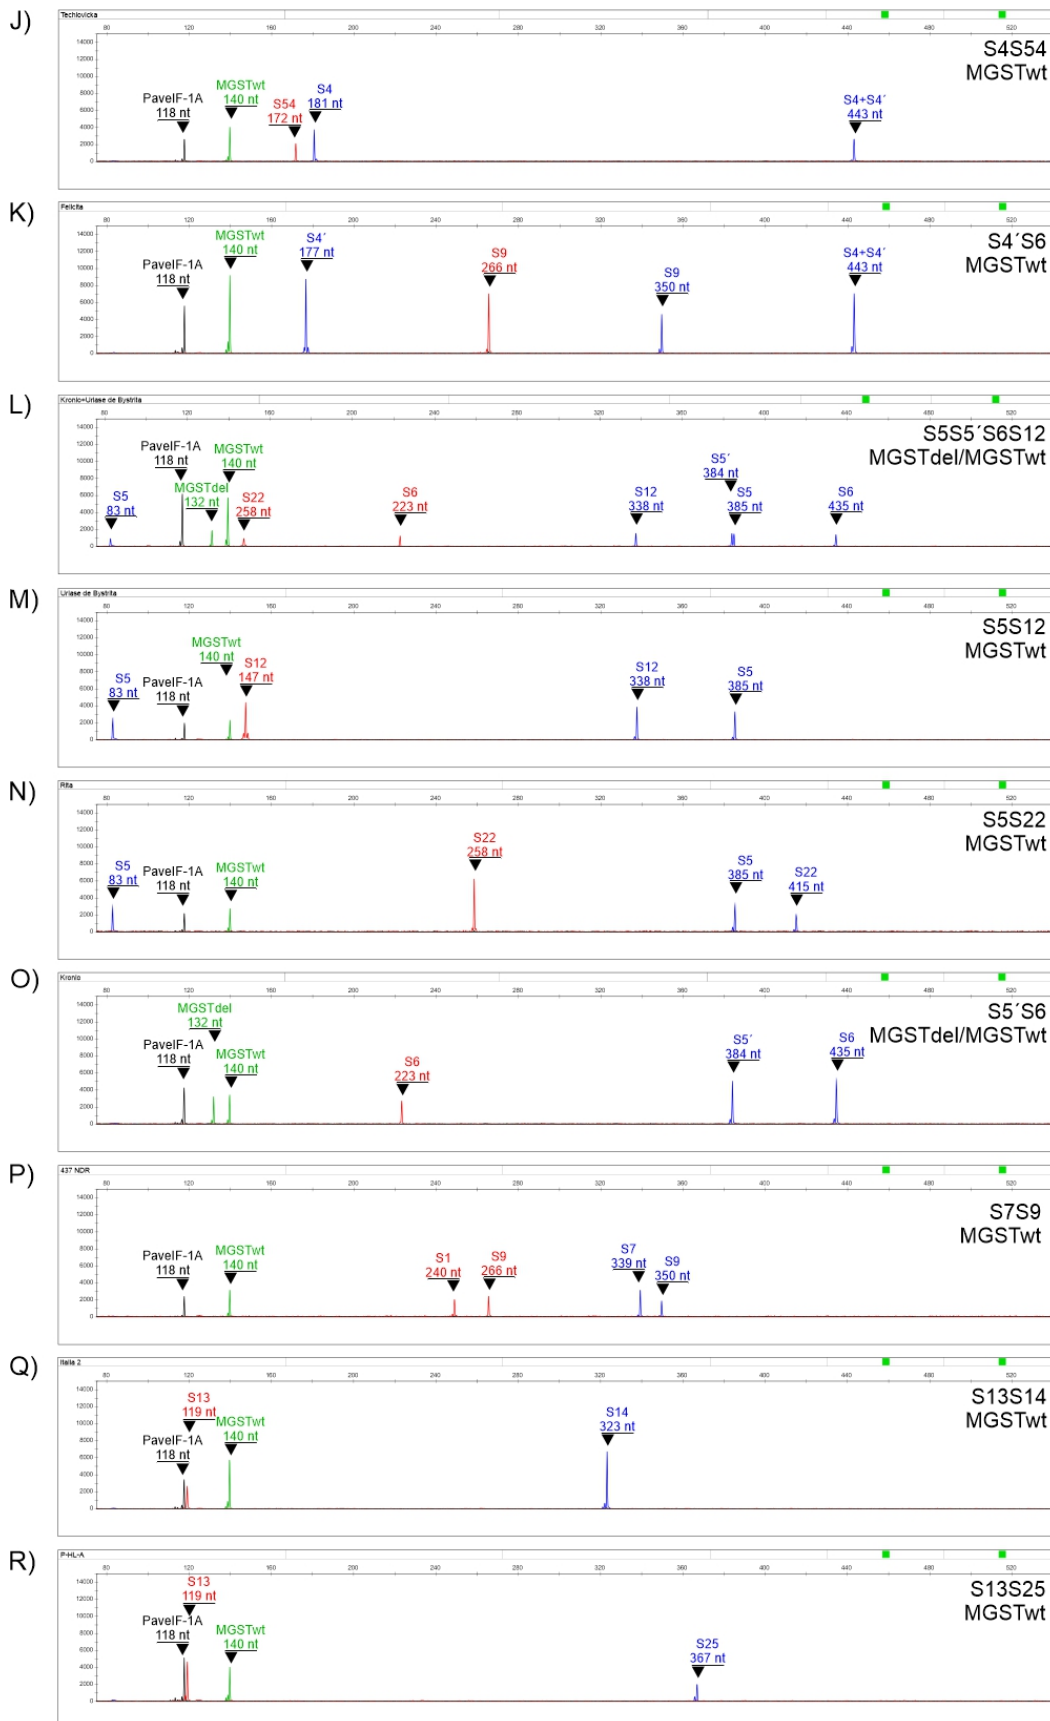

**Figure S6:** Outputs of fragment analyses in two cultivars using three different PCR reagents: Phusion Flash High-Fidelity PCR Master Mix (ThermoFisher Scientific), PCR Master Mix (2X) (ThermoFisher Scientific) and qPCR 2x Blue Master Mix (Top-Bio). A) 'Felicita'; B) 'Feldes Frühe Schwarze'.

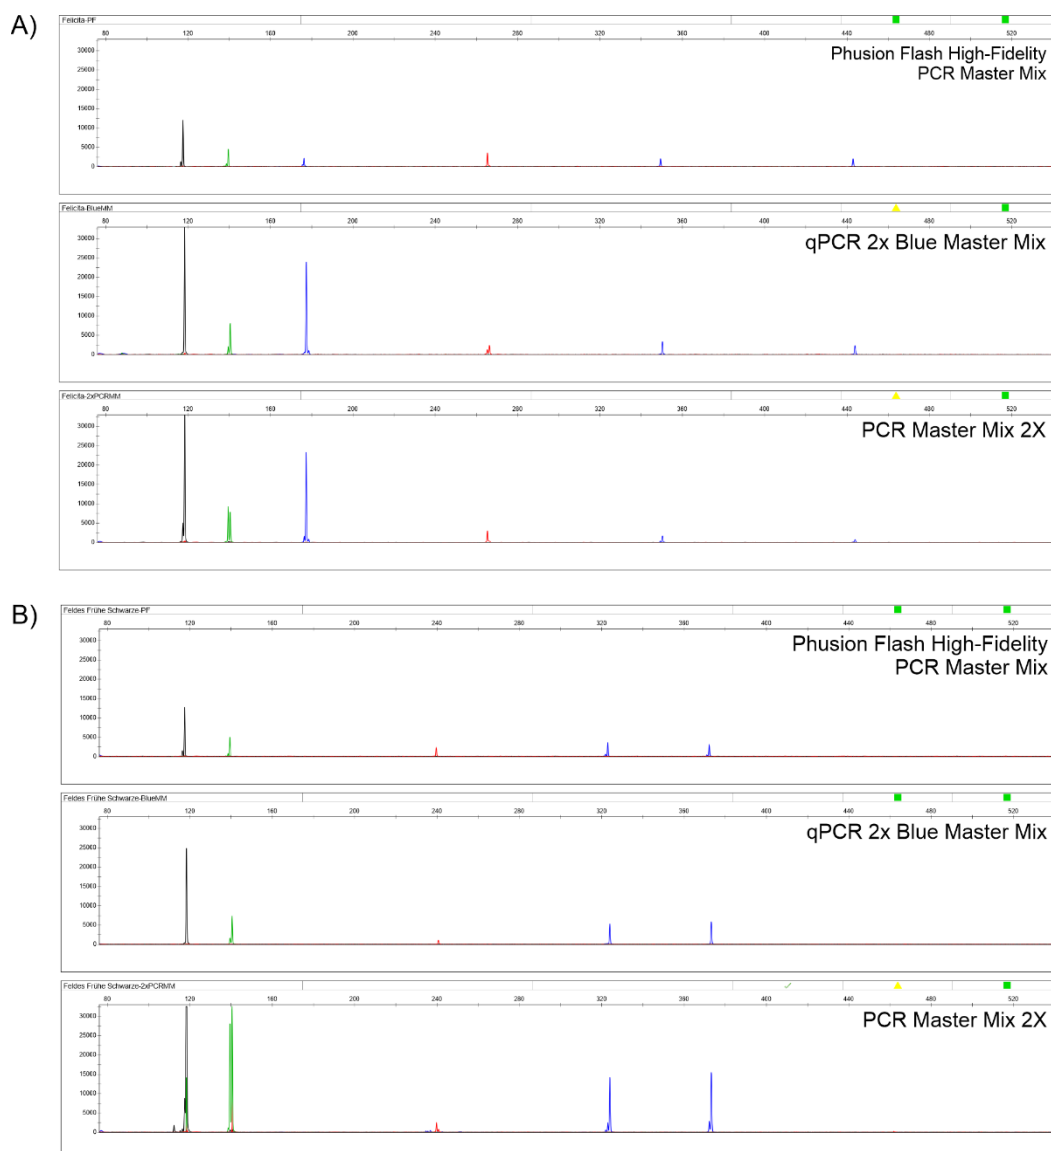

**Table S1.** The list of sweet cherry varieties used in the study.  
Provided as a separate Excel file.

**Table S2.** Sequences used in the study. Reference sequences retrieved from the GenBank ([National Center for Biotechnology Information \(nih.gov\)](https://www.ncbi.nlm.nih.gov/)) or [GDR \(rosaceae.org\)](https://www.rosaceae.org/).

|           | S-RNase*             | SFB        | MGST*                          | PaveIF-1A                      |
|-----------|----------------------|------------|--------------------------------|--------------------------------|
| S1        | AJ635282; AJ635281   | AB111518   |                                |                                |
| S2        | AJ635284; AJ635283   | AB111519   |                                |                                |
| S3        | AY571663             | AY571665   |                                |                                |
| S3'       |                      |            |                                |                                |
| S4        | AB028154.1           | AB111521   |                                |                                |
| S4'       |                      | AY649873   |                                |                                |
| S5        | AJ635290; AJ635289   | AB111520   |                                |                                |
| S5'       | EU077235             | EU077237   |                                |                                |
| S6        | AY571664; AJ635291   | AY805051   |                                |                                |
| S7        | EU035974; AJ635268   | EU035976   |                                |                                |
| S9        | AJ635271; AJ635270   | DQ422809   |                                |                                |
| S10       | JQ280519             | AY805053   |                                |                                |
| S12       | AY259115; AJ635274   | AY805054.1 |                                |                                |
| S13       | DQ385842; AJ635276   | DQ385844   |                                |                                |
| S14       | AJ635278; AJ635277   |            |                                |                                |
| S16       | AJ635280; AJ635279   | AY805056.1 |                                |                                |
| S17       | JQ280528             |            |                                |                                |
| S18       | JQ280533             |            |                                |                                |
| S19       | DQ336139             |            |                                |                                |
| S20       | AJ862659             |            |                                |                                |
| S21       | AJ863119             |            |                                |                                |
| S22       | EF429142; DQ336138   |            |                                |                                |
| S23       | AY259114             |            |                                |                                |
| S24       | AY259112             |            |                                |                                |
| S25       | AY259113             |            |                                |                                |
| S27       | DQ266439             |            |                                |                                |
| S28       | DQ266440             |            |                                |                                |
| S29       | DQ266441             |            |                                |                                |
| S30       | DQ266442             |            |                                |                                |
| S31       | DQ266443             |            |                                |                                |
| S32       | DQ266444             |            |                                |                                |
| S34       | JQ280525             |            |                                |                                |
| S37       | JQ280522             |            |                                |                                |
| S38       | JQ280516             |            |                                |                                |
| S54       | OQ555802; this study |            |                                |                                |
| MGSTwt    |                      |            | LG_3: 18395575 –<br>15400614** |                                |
| MGSTdel   |                      |            |                                |                                |
| MGSTins   |                      |            | LC371380                       |                                |
| PaveIF-1A |                      |            |                                | LG_3: 15263431 –<br>15262737** |

\* In case sequences or their parts necessary for alignments were missing, sequences were generated in this study. See the text for more details.

\*\* Retrieved from Sweet cherry Genome v1.0.
